# Supplementary material for: Efficient detection ofl-aspartic acid andl-glutamic acid by self-assembled fluorescent microparticles with AIE and FRET activities
Source: Royal Society of Chemistry journal article supplement (doi:10.1039/d2ob02297d), 2023-01-01
Supplement: d2ob02297d1.pdf [file d2ob02297d1.pdf]

# Efficient detection of L-Aspartic acid and L-Glutamic acid by a self-assembled fluorescent microparticle with AIE and FRET activities

Wen-Juan Qu\*, Tingting Liu, Yongping Chai, Dongyan Ji, Yu-Xin Che, Jian-Peng Hu, Hong Yao, Qi Lin, Tai-Bao Wei and Bingbing Shi\*

*Key Laboratory of Eco-Environment-Related Polymer Materials, Ministry of Education of China; College of Chemistry and Chemical Engineering, Northwest Normal University, Lanzhou, Gansu, 730070. P. R. China*

*Email: bingbingshi@nwnu.edu.cn; quwenjuanlz@163.com*

## Electronic Supplementary Information (9 pages)

|                                                                                   |    |
|-----------------------------------------------------------------------------------|----|
| 1. Materials and methods .....                                                    | S1 |
| 2. Synthesis of compounds .....                                                   | S1 |
| 3. Normalized spectral overlap .....                                              | S4 |
| 4. TEM experiments .....                                                          | S4 |
| 5. Fluorescent spectrum of P1 .....                                               | S5 |
| 6. Time dependent <sup>1</sup> H NMR spectrum of TPE-P .....                      | S5 |
| 7. <sup>1</sup> H NMR spectra of TPE-P in the presence of L-Glu and L-Asp .....   | S6 |
| 8. Calculated structures of TPE-P + L-Glu and TPE-P + L-Asp .....                 | S7 |
| 9. <sup>1</sup> H NMR spectra of TPE-P in the presence of other amino acids ..... | S8 |
| 10. References .....                                                              | S9 |

## 1. Materials and methods

All reagents were analytical grade, commercially and without further purification. Melting points were measured on X-4 digital melting-point apparatus and were uncorrected.  $^1\text{H}$  NMR and  $^{13}\text{C}$  NMR spectra were recorded on an Agilent DD2 at 400 MHz and 150 MHz spectra. Electrospray ionization mass spectra (ESI-MS) were measured on an Agilent 1100 LC-MSD-Trap-VL system. UV-vis spectra were recorded on a Shimadzu UV-2550 spectrometer. Fluorescence spectra were recorded on a Shimadzu RF-5301PC fluorescence spectrometer. Study of scanning electron microscopy (SEM), determination of the SEM images was performed on a JSM-6701F FE-SEM microscope.

## 2. Synthesis of compounds

Oxazolo[4,5-b]phenazine-2-thiol **P1** and (2-(4-(4-bromobutoxy)phenyl)ethene-1,1,2-triyl)tribenzene **TPE-1** were prepared according to the literature procedures.<sup>S1-S4</sup>

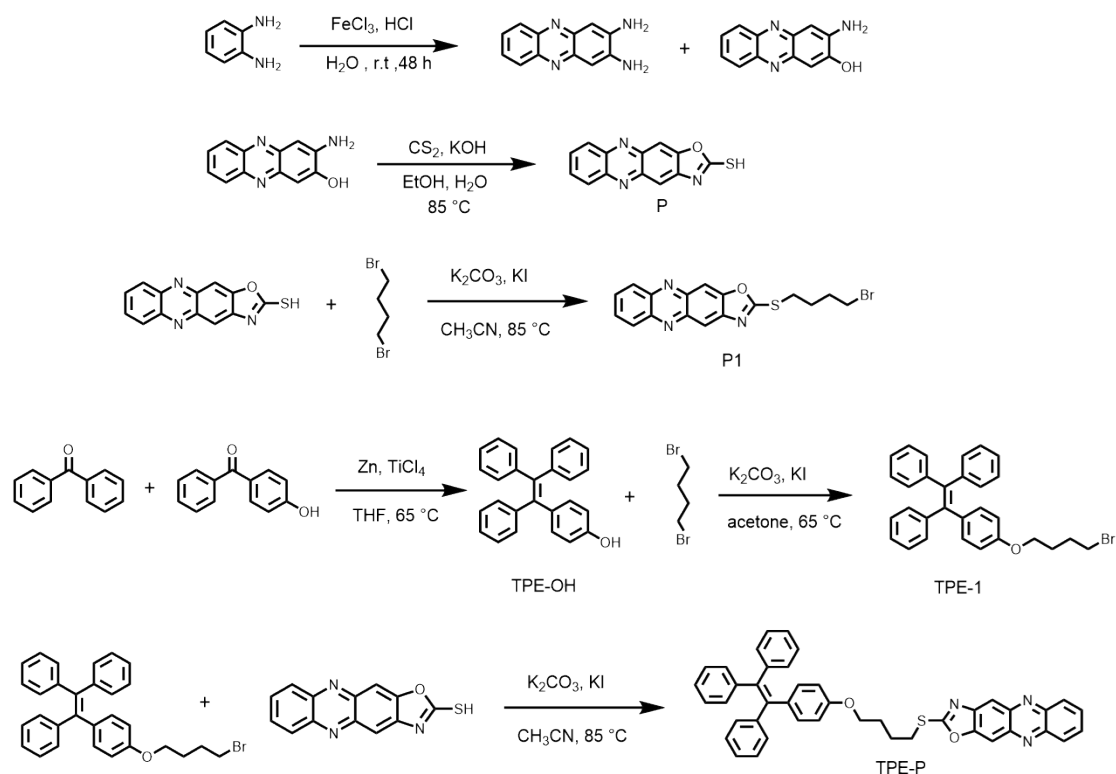

**Scheme S1.** Synthetic route to **TPE-P**.

**Compound TPE-P:** A mixture of oxazolo[4,5-b]phenazine-2-thiol **P1** (1.00 mmol, 0.253 g), (2-(4-(4-bromobutoxy) phenyl) ethene-1,1,2-triyl) tribenzene **TPE-1** (0.50 mmol, 0.241 g), K<sub>2</sub>CO<sub>3</sub> (3 mmol, 0.414 g) and KI (3 mmol, 0.498 g) was added to a 100 mL round-bottom flask, and the reaction mixture was stirred at 85 °C for 24 h under nitrogen atmosphere. The crude product was purified by silica gel column chromatography using petroleum ether/ethyl acetate (v:v = 10:1) as the eluent to isolate the compound **TPE-P** as yellow solid (0.082 g, yield 25%). M.p. > 300 °C. The proton NMR spectrum of compound **TPE-P** is shown in Figure S1. <sup>1</sup>H NMR (400 MHz, CDCl<sub>3</sub>) δ (ppm): 8.34 (s, 1H), 8.27–8.23 (m, 2H), 8.15 (s, 1H), 7.86–7.83 (m, 2H), 7.09 (m, 7H), 7.05–7.00 (m, 7H), 6.93 (d, *J* = 8.8 Hz, 3H), 6.64 (d, *J* = 8.7 Hz, 2H), 3.99 (t, *J* = 5.9 Hz, 2H), 3.50 (d, *J* = 7.2 Hz, 2H), 2.11 (d, *J* = 7.6 Hz, 2H), 2.00 (m, 2H). The <sup>13</sup>C NMR spectrum of compound **TPE-P** is shown in Figure S2. <sup>13</sup>C NMR (150 MHz, CDCl<sub>3</sub>) δ (ppm): 157.33, 153.79, 143.94, 140.46, 140.11, 136.24, 132.55, 131.36, 131.33, 130.28, 129.30, 129.13, 127.70, 127.57, 127.04, 115.12, 115.02, 113.55, 105.93, 105.86, 77.22, 77.01, 76.80, 66.86, 32.36, 28.24, 26.07. The ESI-MS of compound **TPE-P** is shown in Figure S3 *m/z*: Calcd for C<sub>43</sub>H<sub>33</sub>N<sub>3</sub>O<sub>2</sub>S [1 + H]<sup>+</sup>: 656.2371, found 656.2356, error = -1.80 × 10<sup>-6</sup>.

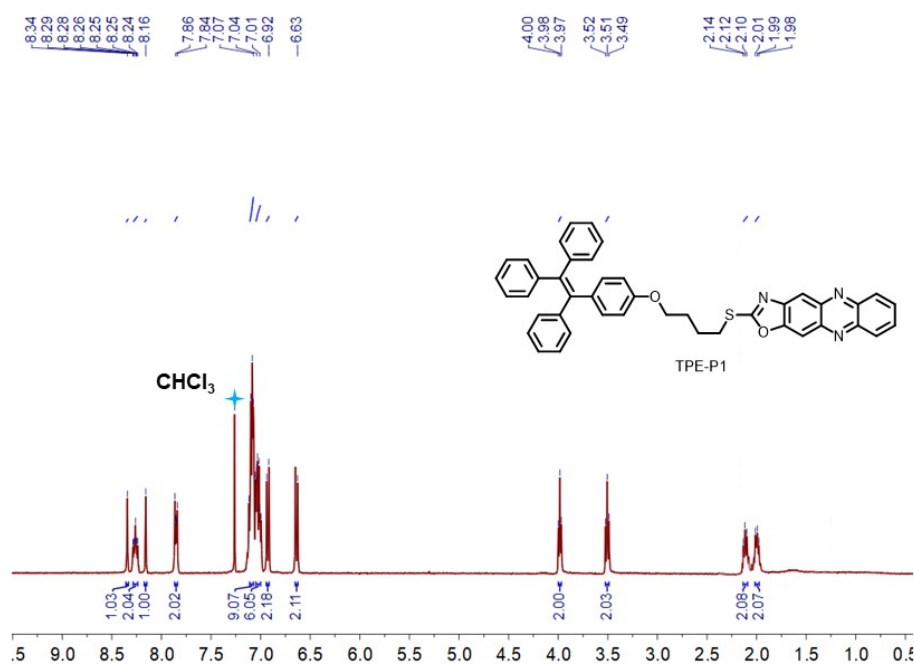

**Fig. S1.** <sup>1</sup>H NMR spectrum of **TPE-P** in CDCl<sub>3</sub>.

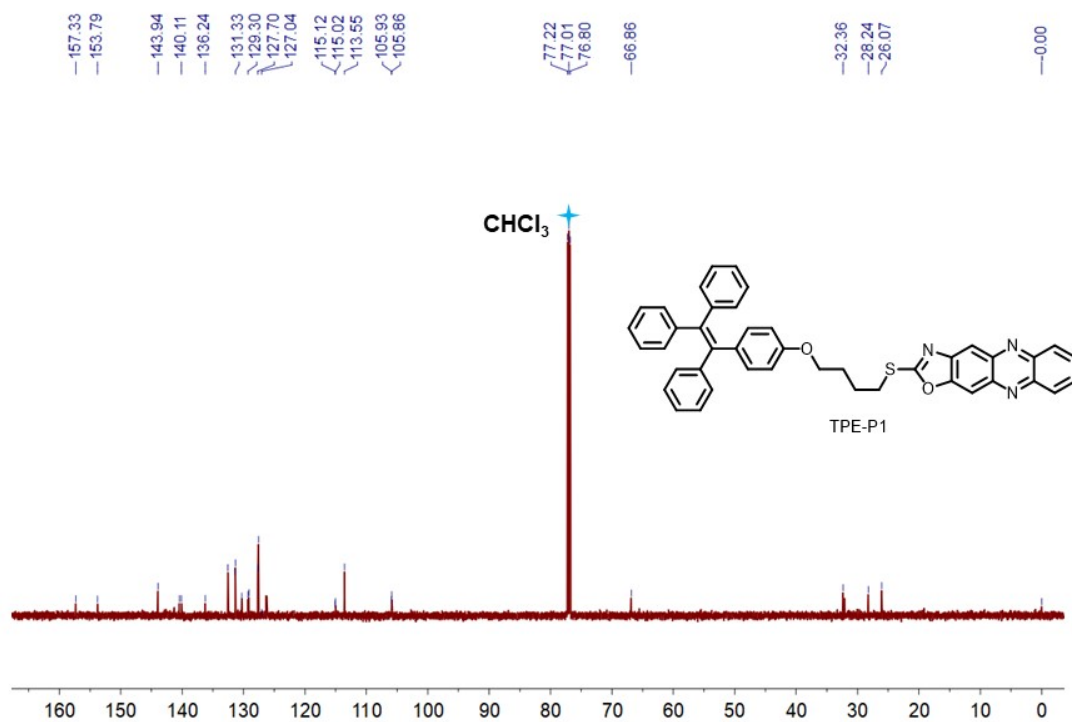

**Fig. S2.**  $^{13}\text{C}$  NMR spectrum of TPE-P in  $\text{CDCl}_3$ .

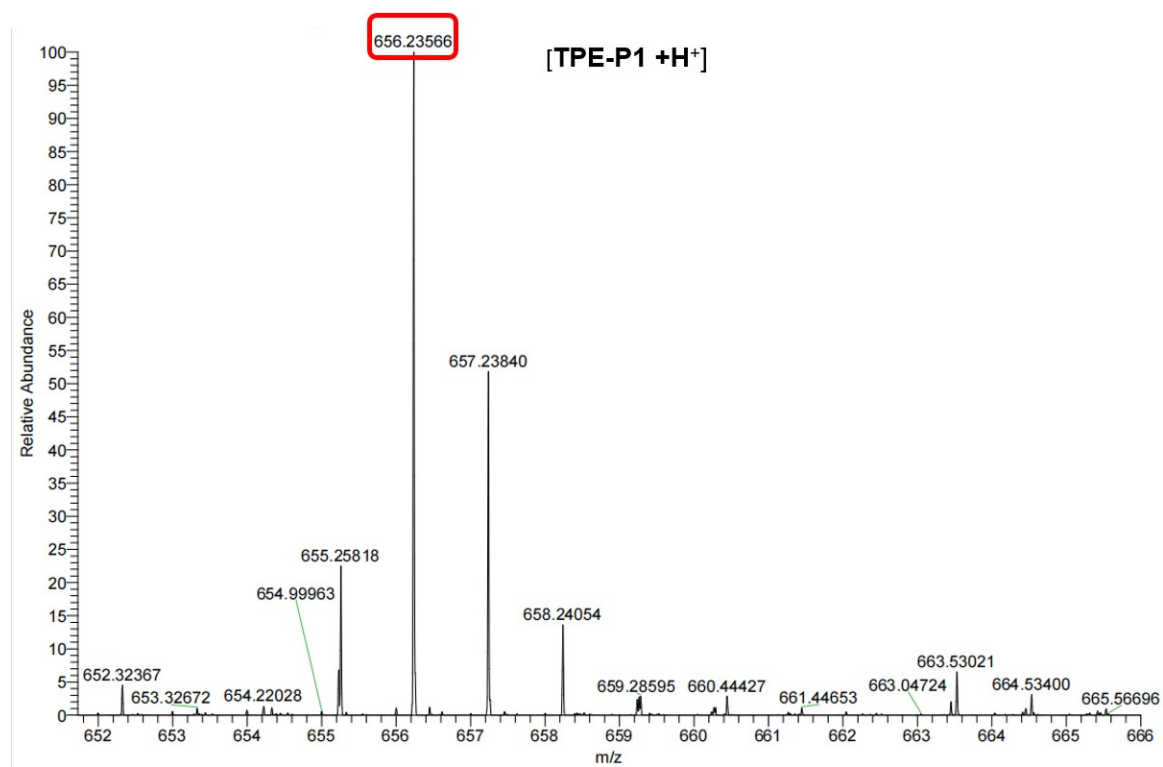

**Fig. S3.** The ESI-MS of TPE-P:  $[\text{M} + \text{H}]^+ = 656.23566$ .

### 3. Normalized spectral overlap

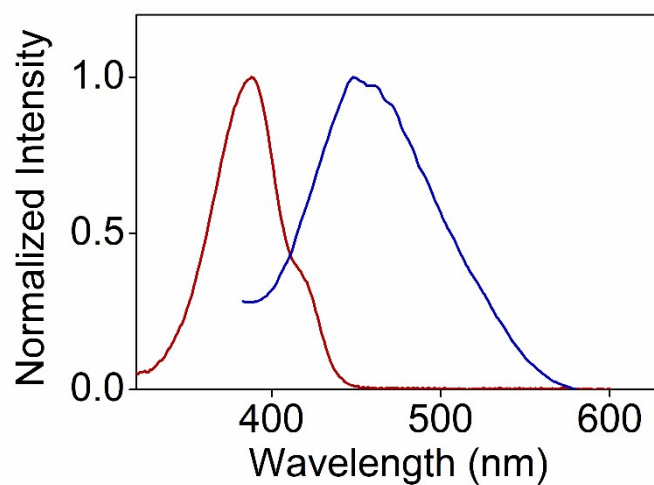

**Fig. S4.** Normalized spectral overlap between absorption spectrum of **P1** (red line) and emissive spectrum of **TPE-1** (blue line) in THF/ H<sub>2</sub>O (v:v = 1:1).

### 4. TEM experiments

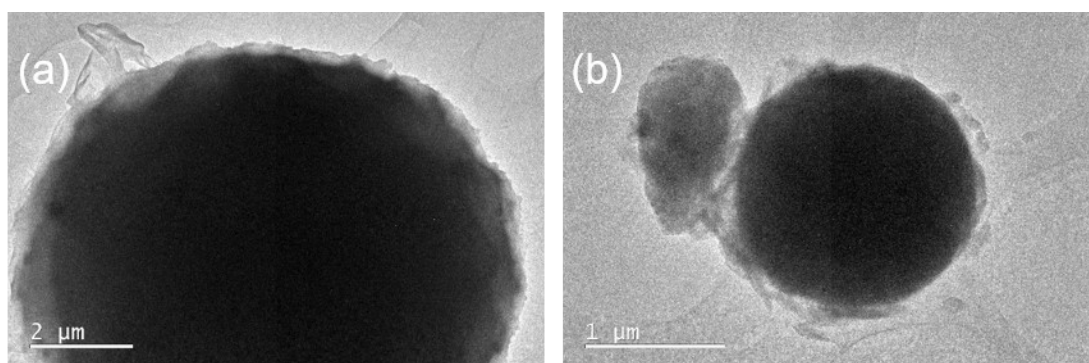

**Fig. S5** (a) TEM image of **TPE-P** ( $2 \times 10^{-5}$  M) in THF/H<sub>2</sub>O (1/1; v/v). (b) TEM image of **TPE-P** ( $2 \times 10^{-5}$  M) in THF/H<sub>2</sub>O (1/1; v/v) after 36 hours.

5. Fluorescent spectrum of **P1**

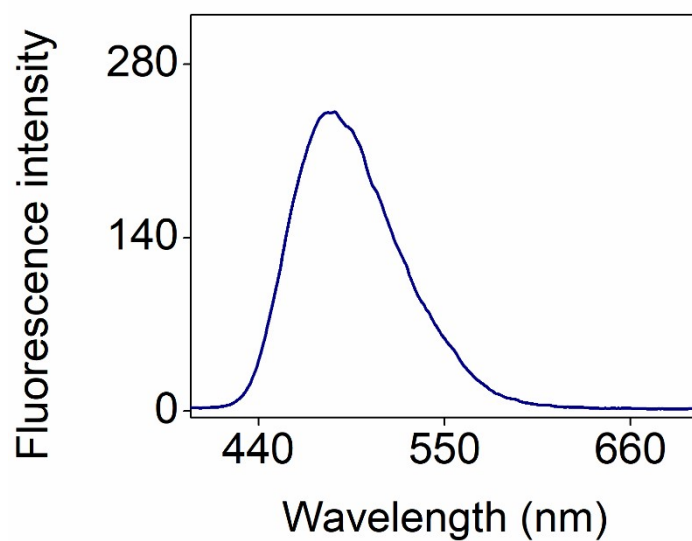

*Fig. S6* Fluorescent spectrum of **P1** in THF/H<sub>2</sub>O (1/1; v/v).

6. Time dependent <sup>1</sup>H NMR spectrum of **TPE-P**

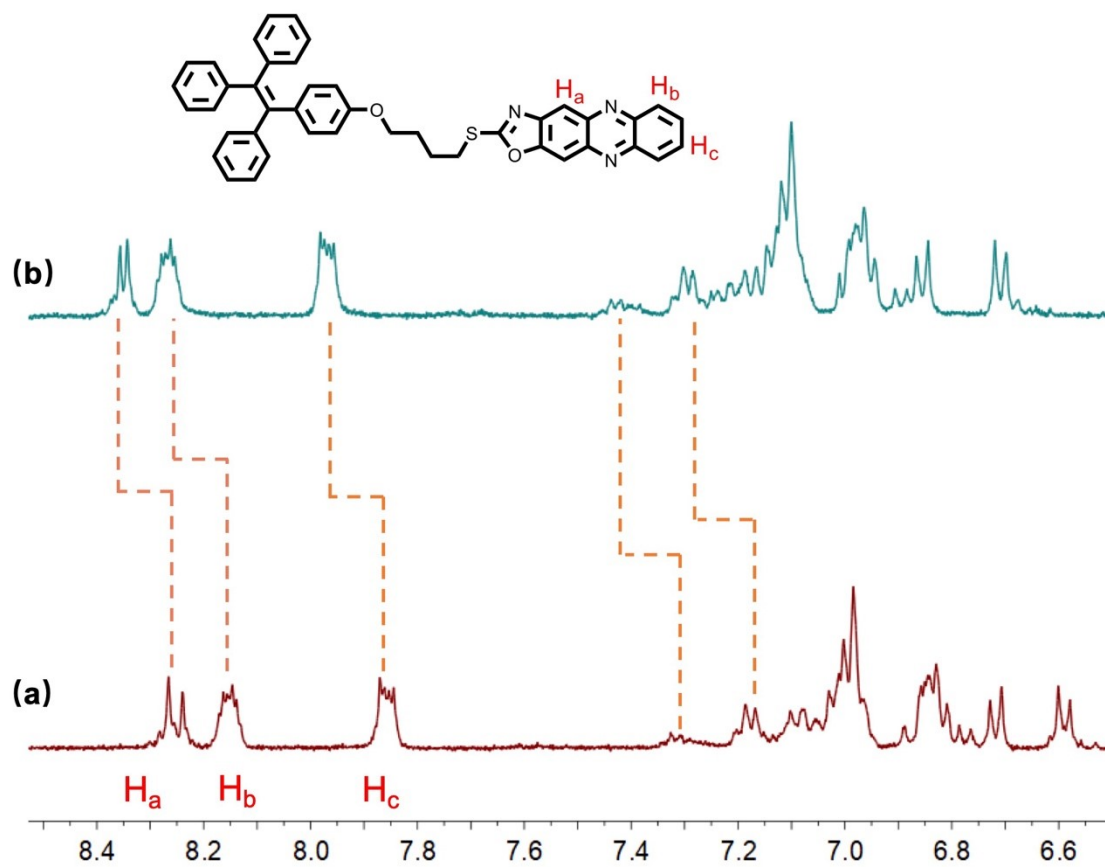

*Fig. S7* Time dependent <sup>1</sup>H NMR spectrum of **TPE-P** in DMSO-*d*<sub>6</sub> at 293 K. (a) 0 hour, (b) 36 hours.

7.  $^1\text{H}$  NMR spectra of **TPE-P** in the presence of L-Glu and L-Asp

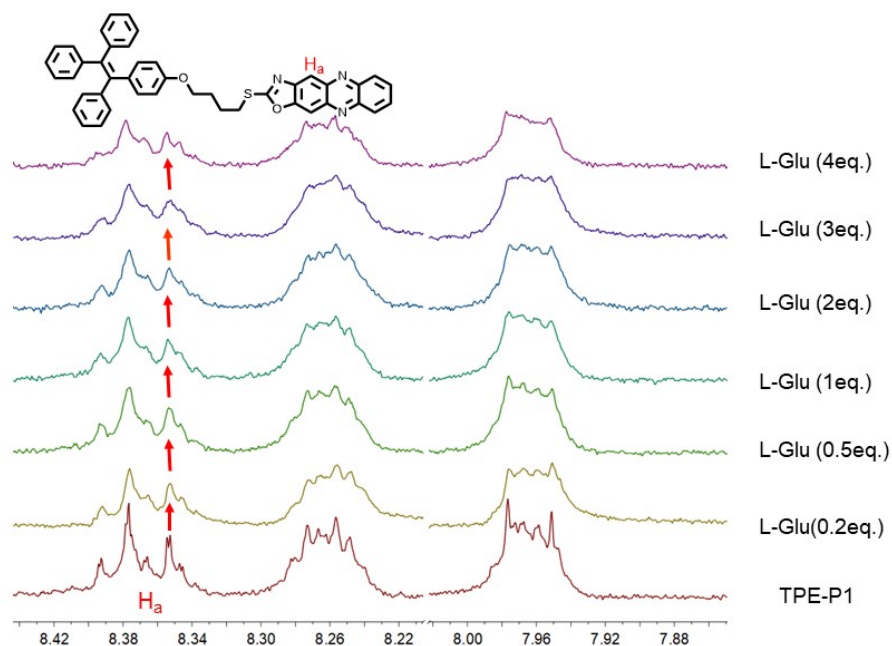

**Fig. S8.** Partial  $^1\text{H}$  NMR spectra of **TPE-P** (400 MHz) in the presence of various molar equivalents of L-Glu in  $\text{DMSO-}d_6$  at 293 K.

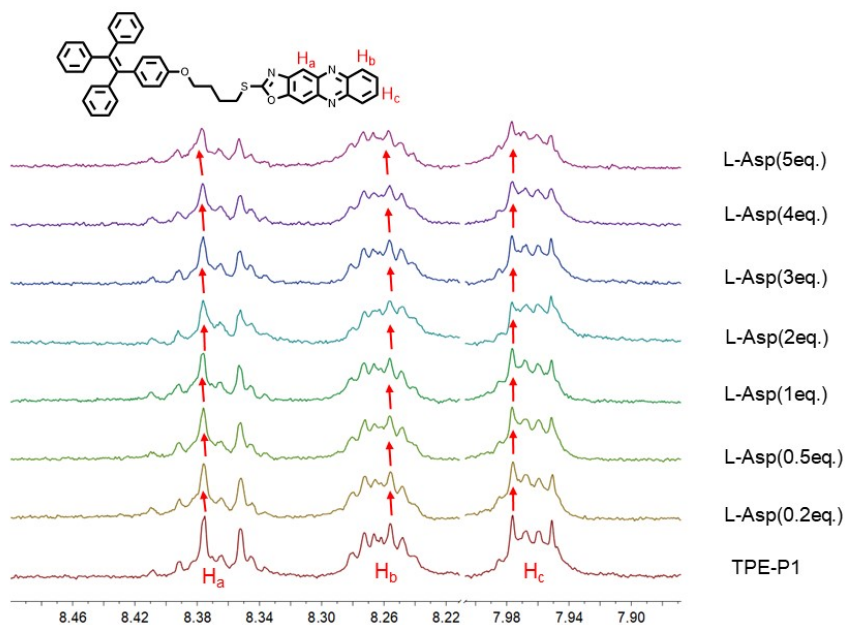

**Fig. S9.** Partial  $^1\text{H}$  NMR spectra of **TPE-P** (400 MHz) in the presence of various equivalents of L-Asp in  $\text{DMSO-}d_6$  at 293 K.

8. Calculated structures of TPE-P + L-Glu and TPE-P + L-Asp

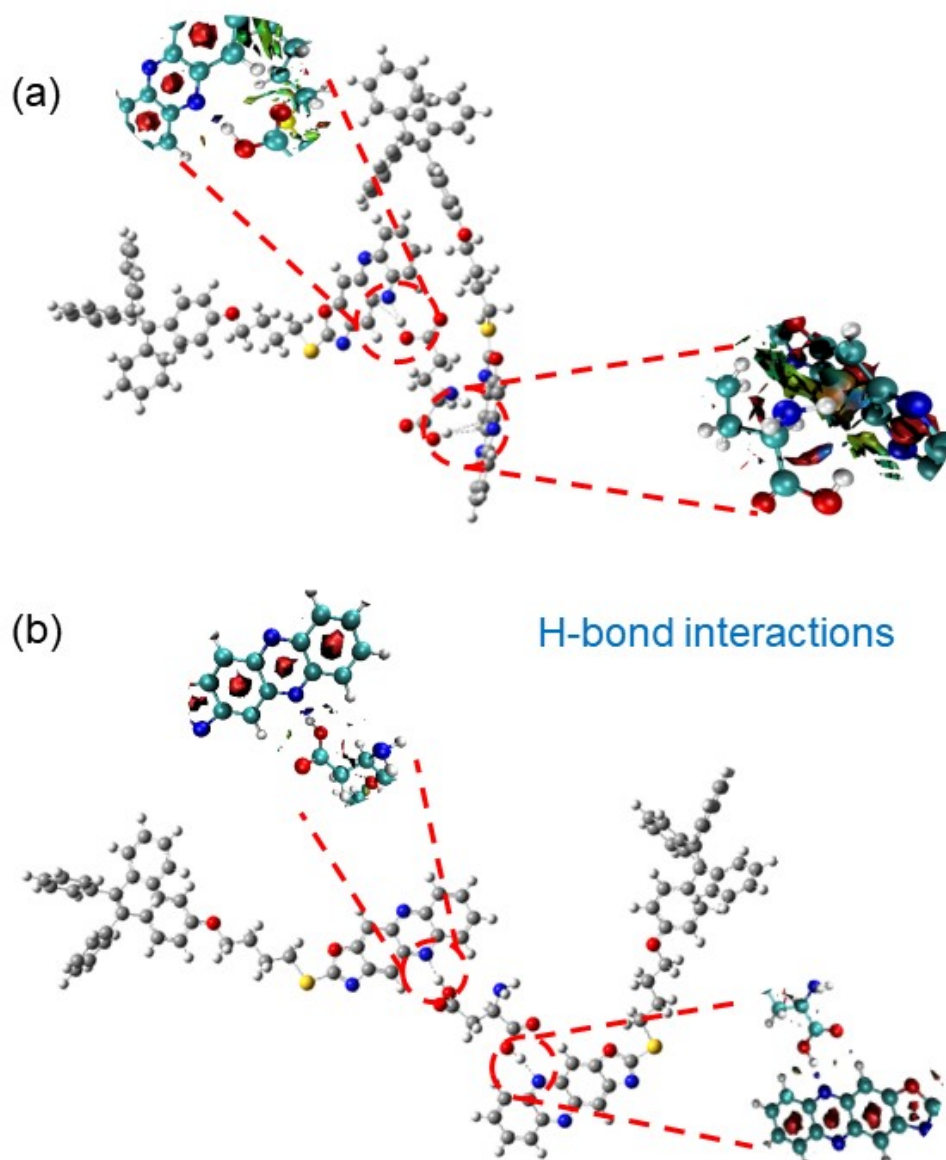

*Fig. S10* The calculated structures of (a) TPE-P + L-Glu, (b) TPE-P + L-Asp, L-Glu and L-Asp interact with phenazine group by hydrogen bonding.



9.  $^1\text{H}$  NMR spectra of **TPE-P** in the presence of other amino acids

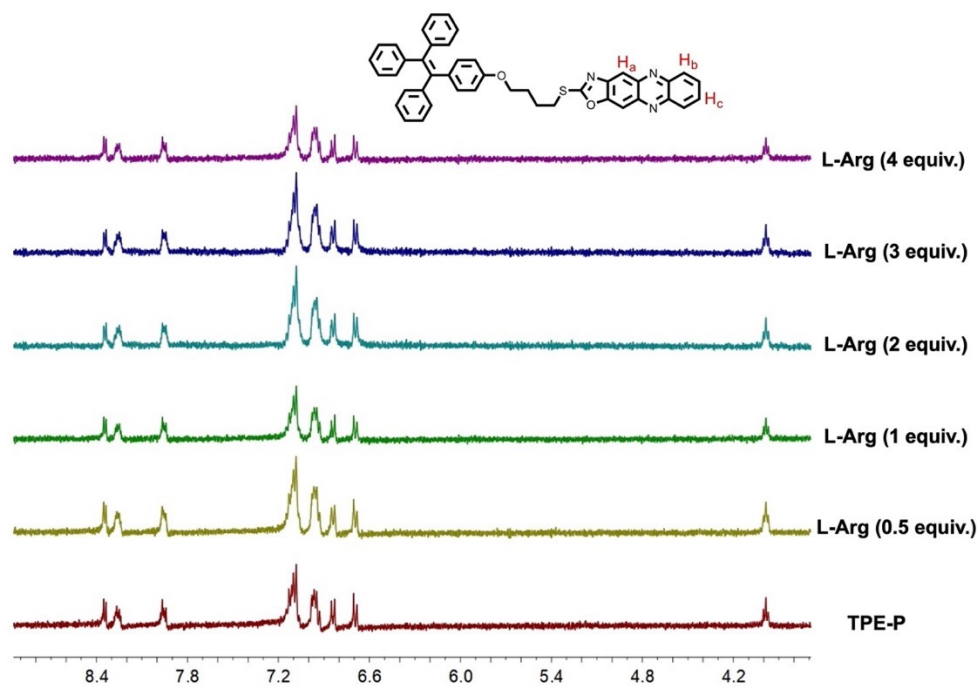

**Fig.S11** Partial  $^1\text{H}$  NMR spectra of **TPE-P** (400 MHz) in the presence of various molar equivalents of L-Arg in  $\text{DMSO-}d_6$  at 293 K.

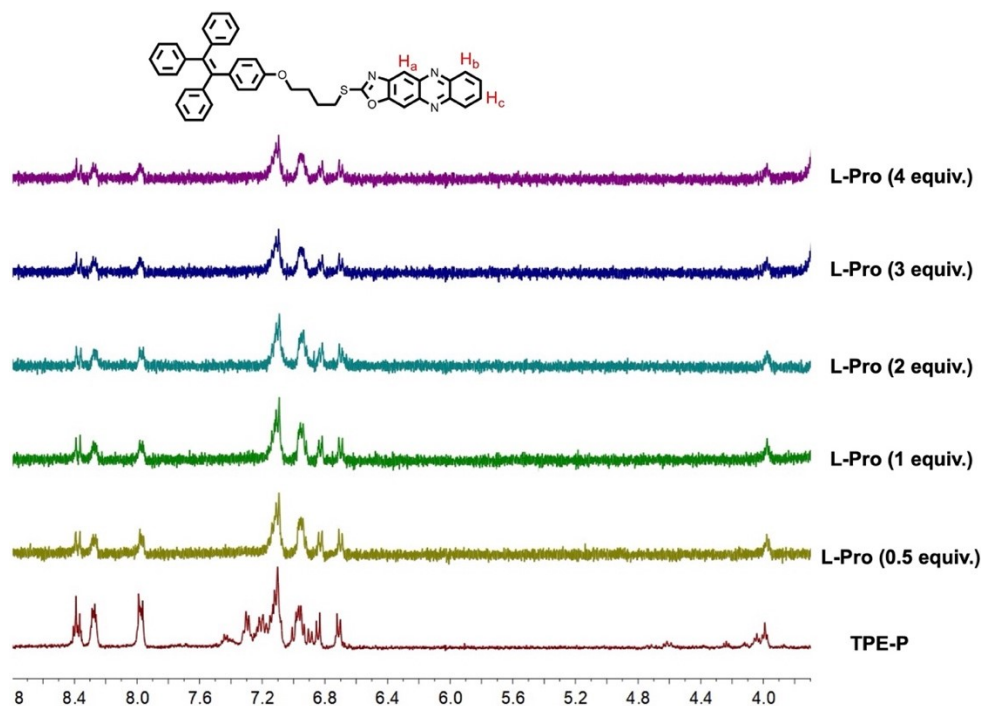

**Fig. 12** Partial  $^1\text{H}$  NMR spectra of **TPE-P** (400 MHz) in the presence of various molar equivalents of L-Pro in  $\text{DMSO-}d_6$  at 293 K.

## 10. References

- S1. Q. Lin, G.-F. Gong, Y.-Q. Fan, Y.-Y. Chen, J. Wang, X.-W. Guan, J. Liu, Y.-M. Zhang, H. Yao, and T.-B. Wei, *Chem. Commun.*, 2019, 55, 3247-3250.
- S2. B. Shi, X.-X. Zhao, Y. Chai, P. Qin, W.-J. Qu, Q. Lin, and Y.-M. Zhang, *Chemistryselect*, 2022, 7, e202200757.
- S3. H. Chang, W. Mao, Y. Duan, W. Zhang, C. Zhou, L. Han, L. Li, and S. Che, *J. Mater. Chem. C.*, 2019, 7, 346-353.
- S4. H. Tong, Y. Hong, Y. Dong, M. Häußler, J. W. Y. Lam, Z. Li, Z. Guo, Z. Guo, and B. Z. Tang, *Chem. Commun.*, 2006, 3705-3707.
